# Supplementary material
Source: Springer Nature journal article supplement (https://www.springermedizin.de/resource/supplementary/13045_2009_92_MOESM5_ESM.pdf/9660736)
Supplement: MOESM5 [file 9660736]

**Table I : Small molecule MEK1/2 inhibitors in clinical trials**

| <b>Inhibitor</b> | <b>Company</b>                | <b>Phase</b> | <b>Status</b>       |
|------------------|-------------------------------|--------------|---------------------|
| CI-1040          | Pfizer                        | Phase II     | Development stopped |
| PD0325901        | Pfizer                        | Phase I/II   | Development stopped |
| AZD6244          | Array BioPharma / AstraZeneca | Phase II     | In progress         |
| GDC-0973         | Exelixis / Genentech          | Phase I      | In progress         |
| RDEA119          | Ardea Biosciences / Bayer     | Phase I/II   | In progress         |
| GSK1120212       | GlaxoSmithKline               | Phase I/II   | In progress         |
| AZD8330          | Array BioPharma / AstraZeneca | Phase I      | In progress         |
| RO5126766        | Hoffmann La Roche             | Phase I      | In progress         |
| RO4987655        | Hoffmann La Roche             | Phase I      | In progress         |
| TAK-733          | Millenium Pharmaceuticals     | Phase I      | In progress         |
| AS703026         | EMD Serono                    | Phase I      | In progress         |
